# Supplementary material for: Control of green and red upconversion in NaYF4:Yb3+,Er3+ nanoparticles by excitation modulation
Source: Royal Society of Chemistry journal article supplement (doi:10.1039/c1jm13684d), 2011-01-01
Supplement: c1jm13684d.pdf [file c1jm13684d.pdf]

Electronic Supporting Information (ESI)  
**Control of Green and Red Upconversion in NaYF<sub>4</sub>:Yb<sup>3+</sup>,Er<sup>3+</sup> Nanoparticles by  
Excitation Modulation**

*Christian F. Gainer,<sup>a</sup> Gihan S. Joshua<sup>a</sup>, Channa R. De Silva<sup>b</sup> and Marek Romanowski<sup>\*a</sup>*

<sup>a</sup>*Department of Biomedical Engineering, The University of Arizona, P.O. Box 210240, Tucson, Arizona 85721, United States of America. E-mail: [marekrom@email.arizona.edu](mailto:marekrom@email.arizona.edu)*

<sup>b</sup>*Department of Chemistry and Physics, Western Carolina University, Cullowhee, North Carolina 28723, United States of America*

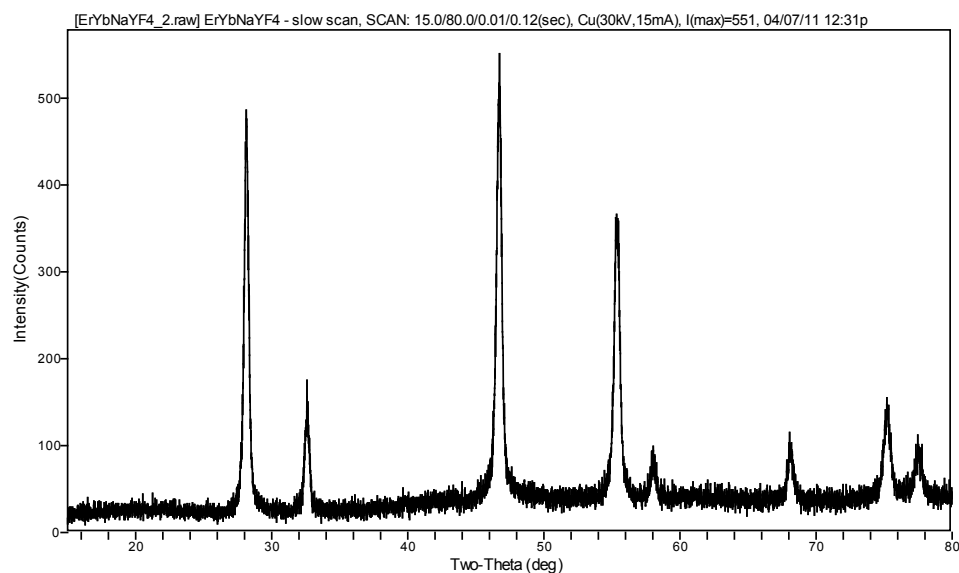

**Fig. S1.** X-ray powder diffraction (XRD) pattern of NaYF<sub>4</sub>:Er<sup>3+</sup>,Yb<sup>3+</sup> nanoparticles.

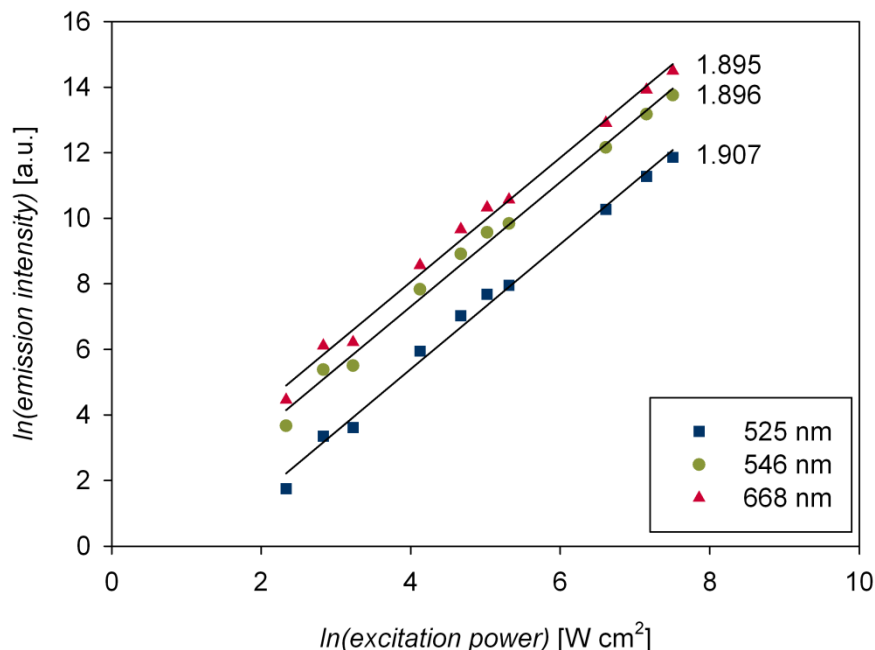

**Fig. S2.** Power density dependence of three emission peaks in NaYF<sub>4</sub>: Yb<sup>3+</sup>, Er<sup>3+</sup> nanoparticles. Data for visible peaks are well matched to linear fits with slopes of approximately 2, indicating 2-photon processes. Excitation was by 980 nm laser diode pulsed at 500 Hz with a 100 μs pulse width.

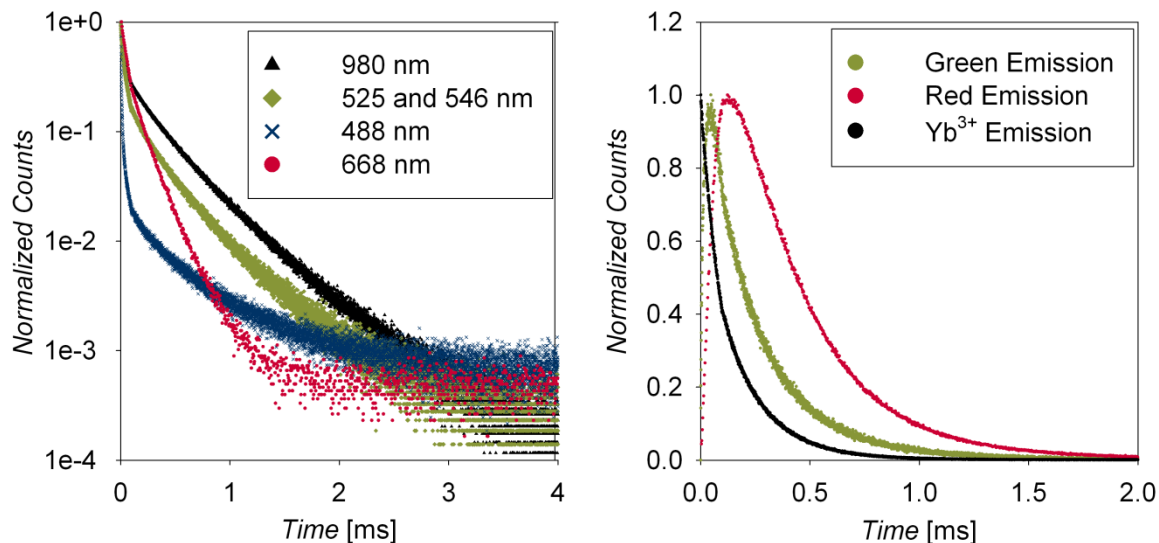

**Fig. S3.** Left: Luminescence decay of NaYF<sub>4</sub>:Er<sup>3+</sup>, Yb<sup>3+</sup> nanoparticles at several wavelengths following direct excitation of the associated transitions. Excitation and measurement matched the wavelengths listed in the legend. Right: Luminescence decay of transitions resulting in green and red emission in upconverting nanoparticles as well as the luminescence decay of NaYF<sub>4</sub>:Yb<sup>3+</sup> nanoparticles at 980 nm. Excitation for all three was 980 nm. Excitation was by an OPO tuned NdYAG laser pulsed at 20 Hz with 3 ns pulse width for all measurements.

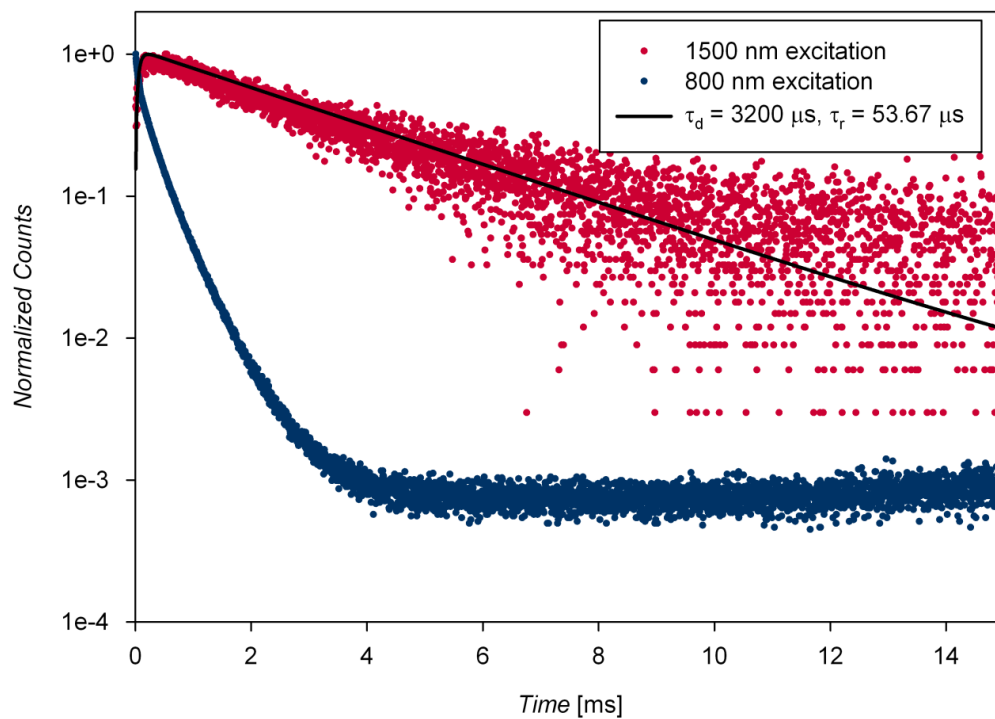

**Fig. S4.** Luminescence decay measured at 980 nm following excitation by 1500 nm (red) and 800 nm (blue).

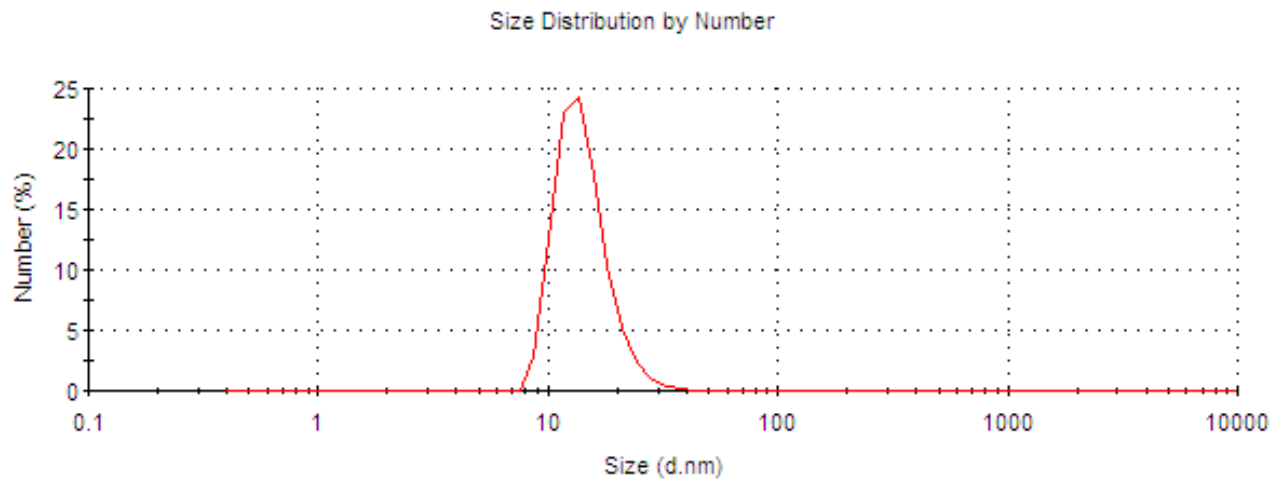

**Fig. S5.** Size distribution of  $\text{NaYF}_4:\text{Er}^{3+}, \text{Yb}^{3+}$  nanoparticles. The peak is at 14.3 nm.

**Coefficients for rate equations presented in the main text:**

$$C_{22} = \frac{k_{02}N_0N_{S^*}^0}{W_2 - W_S} \text{ and } C_{21} = N_2^0 - \frac{k_{02}N_0N_{S^*}^0}{W_2 - W_S}$$

$$C_{42} = \frac{k_{24}N_{S^*}^0N_2^0}{W_4 - (W_S + W_2)} - \frac{k_{02}k_{24}N_0N_{S^*}^0{}^2}{W_4(W_2 - W_S) - (W_S^2 + W_2^2)}$$

$$C_{43} = \frac{k_{02}k_{24}N_0N_{S^*}^0{}^2}{W_4(W_2 - W_S) - 2(W_2W_S - W_S^2)}, \text{ and } C_{41} = -(C_{42} + C_{43})$$

$$C_{31} = -(C_{32} + C_{33} + C_{34} + C_{35}),$$

$$C_{32} = \frac{k_{13}N_{S^*}^0C_{11}}{W_3 - W_S - W_{10}}, C_{33} = \frac{\left(W_{43}C_{42} - \frac{k_{13}N_{S^*}^0C_{21}}{W_2}\right)}{W_3 - W_S - W_2}$$

$$C_{34} = \frac{\left(W_{43}C_{43} - \frac{k_{13}N_{S^*}^0C_{22}}{W_S}\right)}{W_3 - 2W_S}, \text{ and } C_{35} = \frac{W_{43}C_{41}}{W_3 - W_4}$$
